# Supplementary material for: Design, Synthesis, and Biological Evaluation of HDAC Degraders with CRBN E3 Ligase Ligands
Source: MDPI journal article supplement (doi:10.3390/molecules26237241), 2021-11-29

# Design, Synthesis, and Biological Evaluation of HDAC Degrad-ers with CRBN E3 Ligase Ligands

Yingxin Lu <sup>1,†</sup>, Danwen Sun <sup>2,†</sup>, Donghuai Xiao <sup>1</sup>, Yingying Shao <sup>2</sup>, Mingbo Su <sup>2</sup>, Yubo Zhou <sup>2</sup>, Jia Li <sup>2,\*</sup>, Shulei Zhu <sup>1,\*</sup> and Wei Lu <sup>1,\*</sup>

<sup>1</sup> Shanghai Engineering Research Center of Molecular Therapeutics and New Drug Development, School of Chemistry and Molecular Engineering, East China Normal University, 3663 North Zhongshan Road, Shanghai 200062, China; luyingxin\_roy@163.com (Y.L.); cpu\_zsl@163.com (D.X.); wlu@chem.ecnu.edu.cn (W.L.); slzhu@chem.ecnu.edu.cn (S.Z.)

<sup>2</sup> National Center for Drug Screening, State Key Laboratory of Drug Research, Shanghai Institute of Materia Medica, Chinese Academy of Sciences, 189 Guo Shoujing Road, Shanghai 201203, China; dan-wensun1@163.com (D.S.); yingying\_shao1226@163.com (Y.S.); mbsu@simmm.ac.cn (M.S.); ybzhou@simmm.ac.cn (Y.Z.)

\* Correspondence: jli@simmm.ac.cn (J.L.); slzhu@chem.ecnu.edu.cn (S.Z.); wlu@chem.ecnu.edu.cn (W. L.);

† These authors contribute equally.

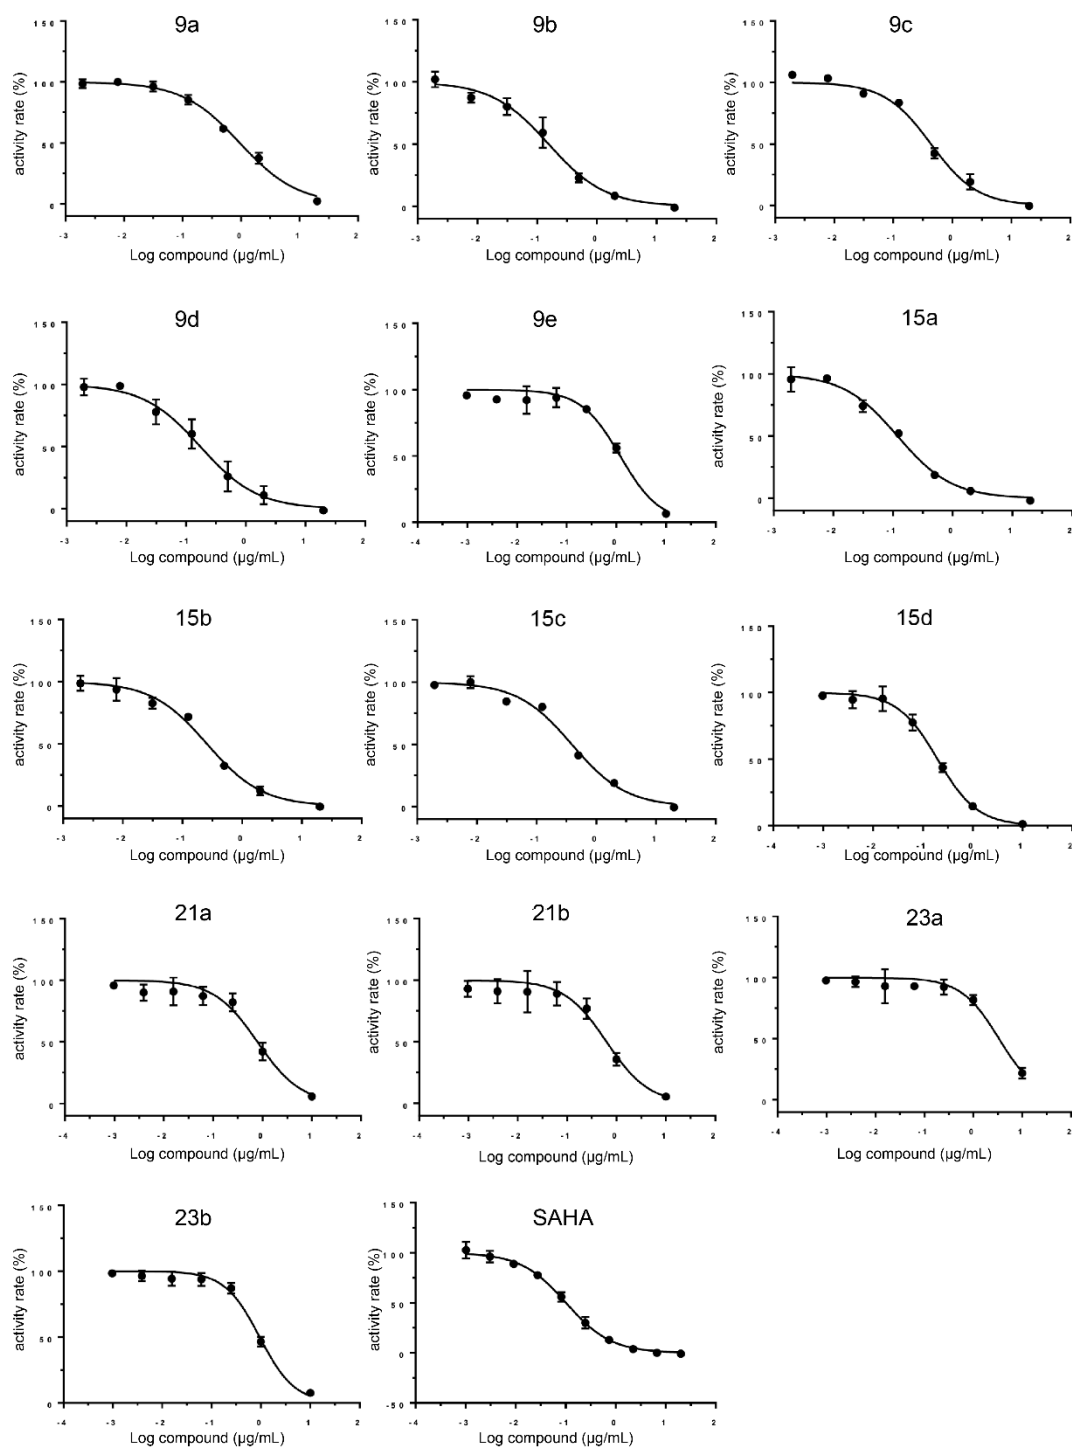

**Figure S1.** IC<sub>50</sub> curve of synthesized PROTACs and SAHA against HDAC1.

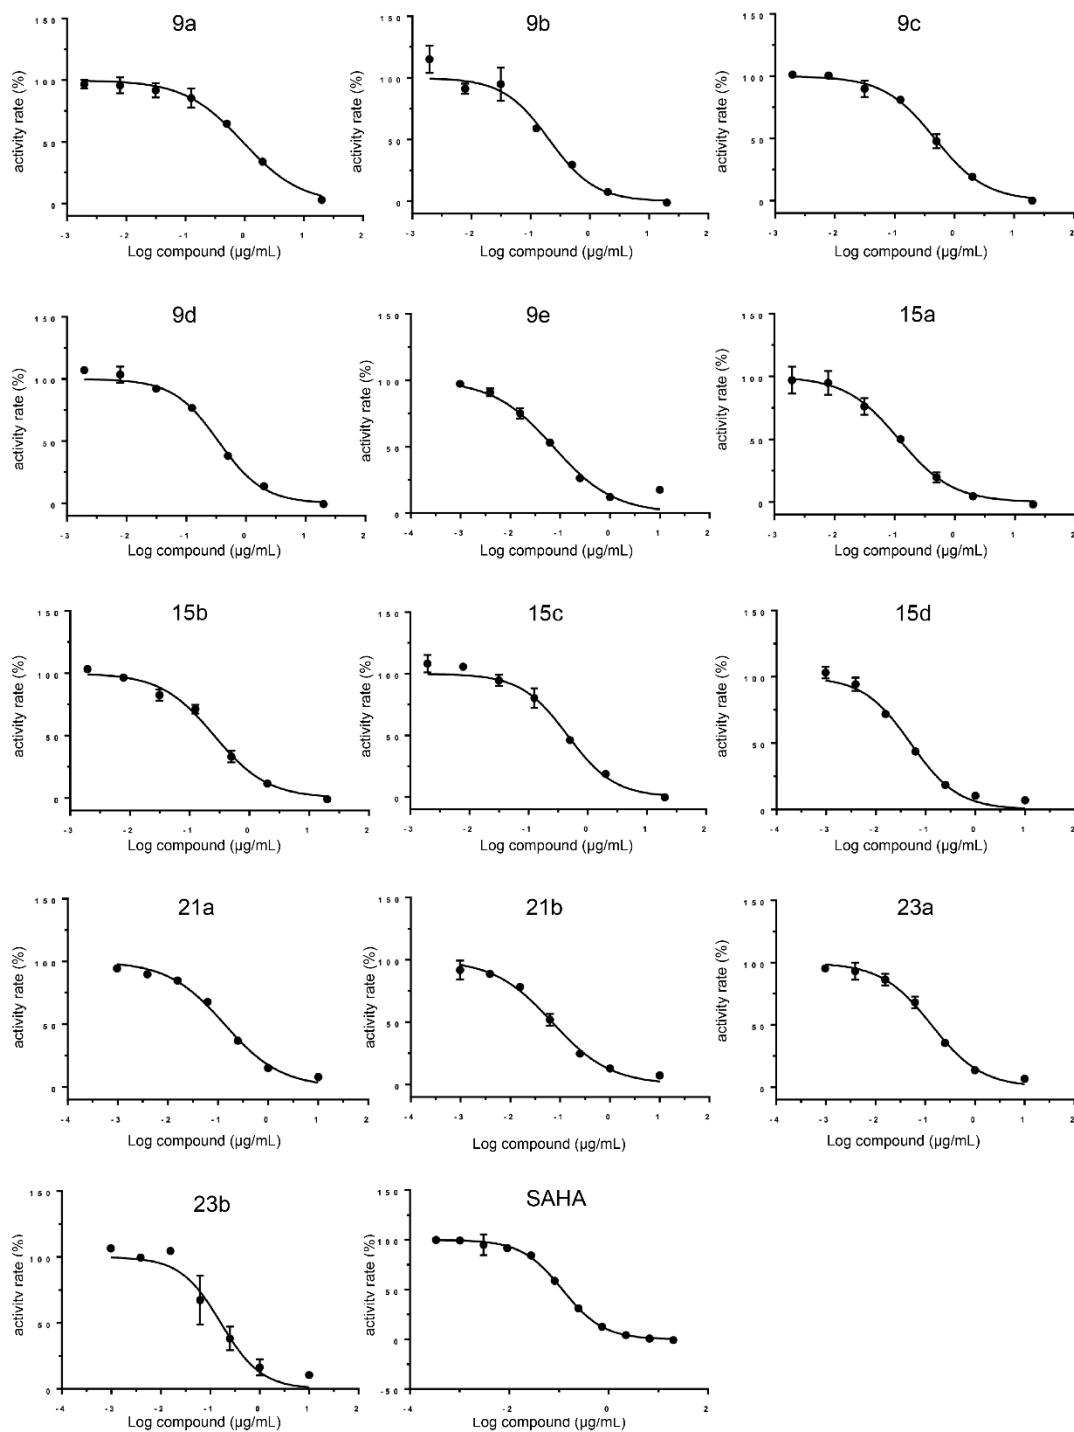

**Figure S2.** IC<sub>50</sub> curve of synthesized PROTACs and SAHA against HDAC3.

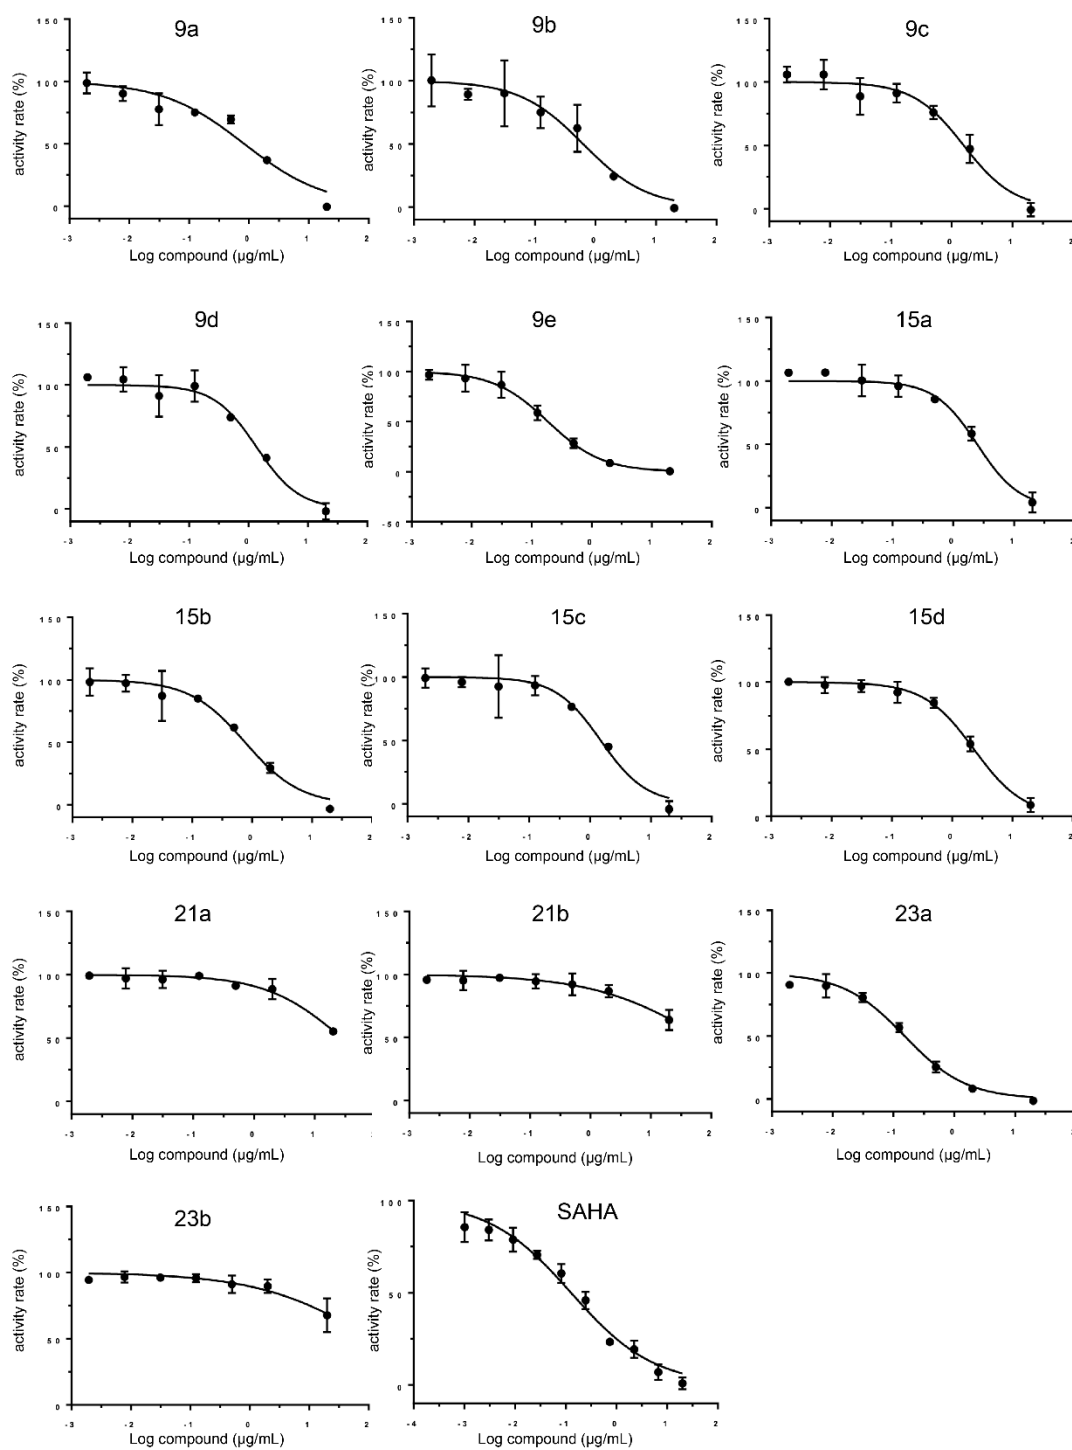

**Figure S3.** IC<sub>50</sub> curve of synthesized PROTACs and SAHA against HDAC6.

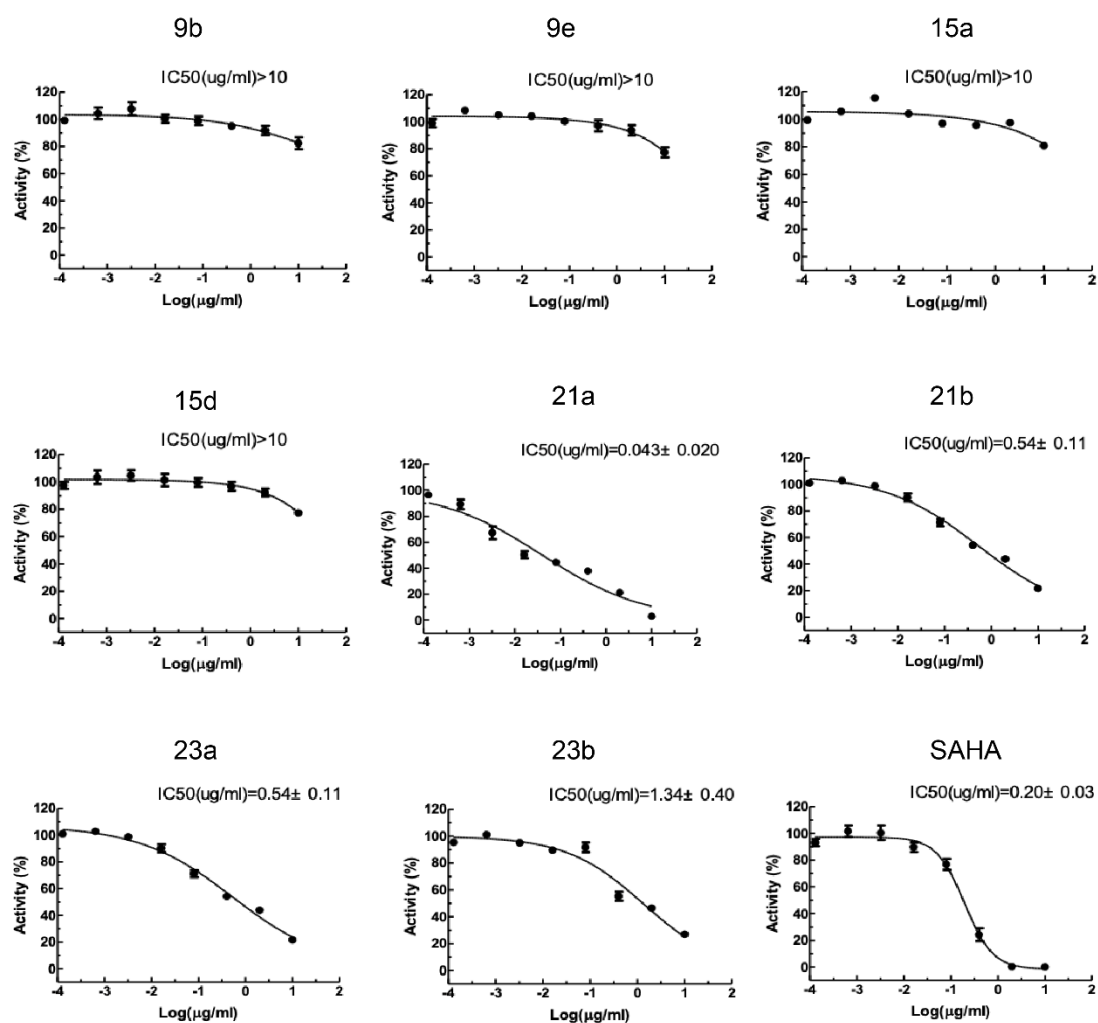

**Figure S4.** IC<sub>50</sub> curve of synthesized PROTACs and SAHA against MM.1S cell line.

<sup>1</sup>H-NMR for **9a**

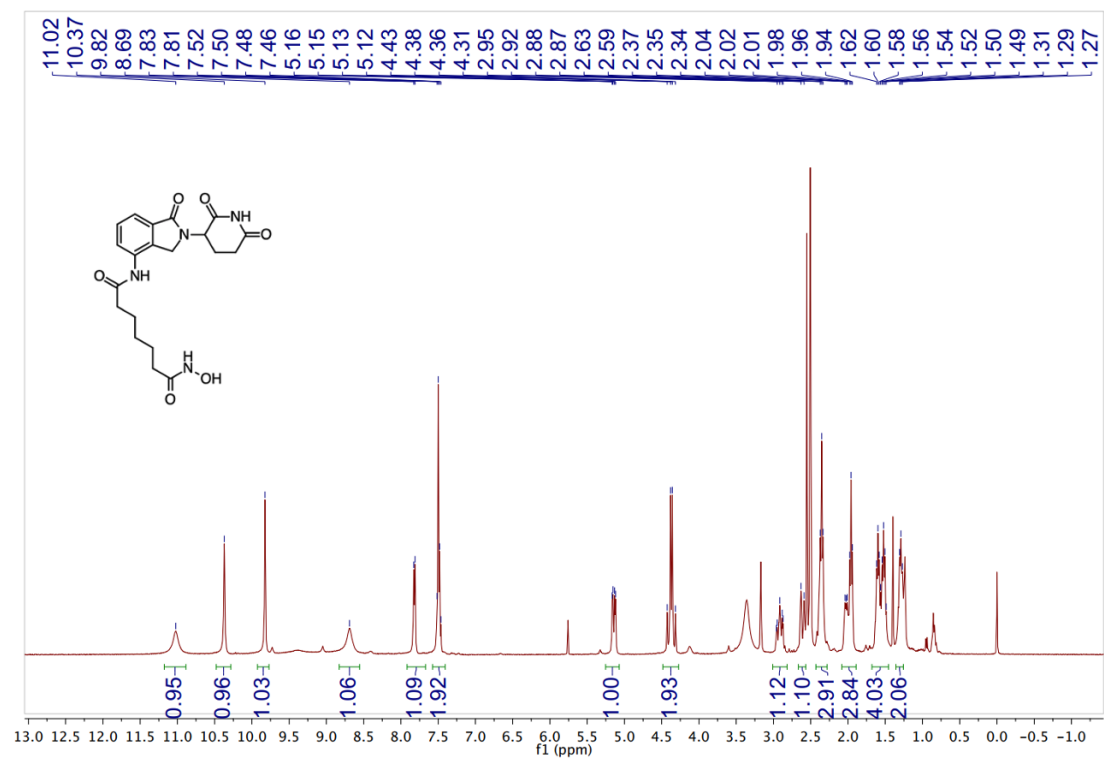

<sup>13</sup>C-NMR for **9a**

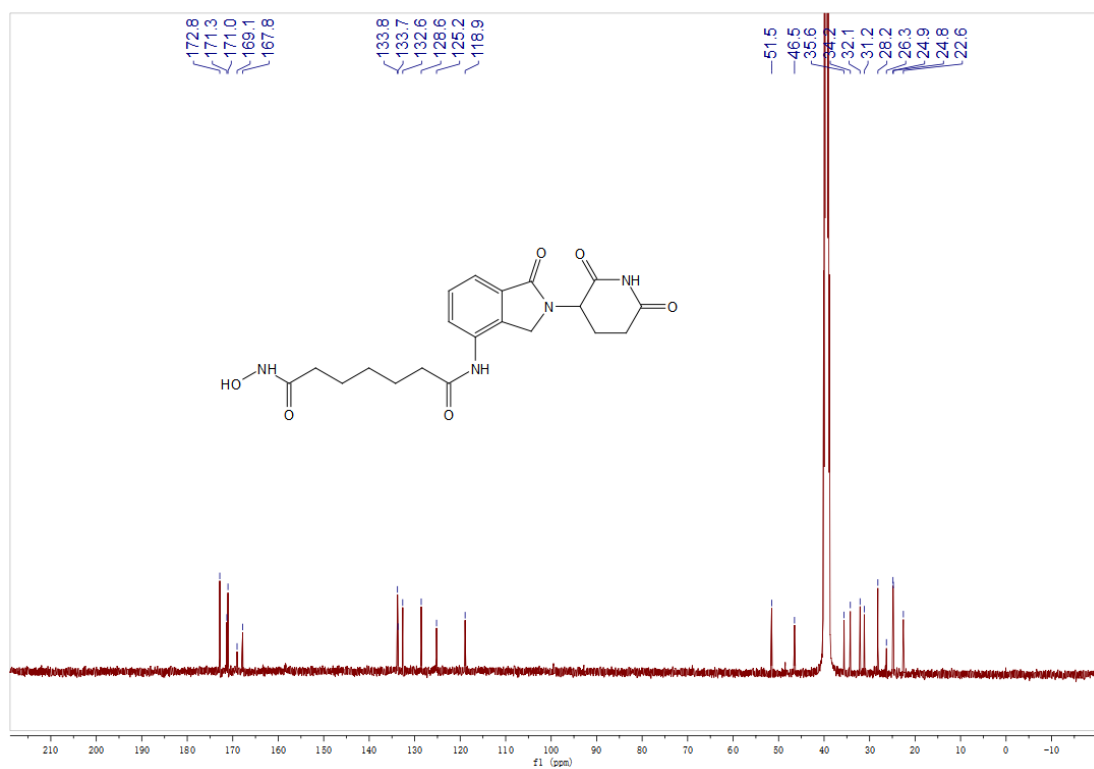

<sup>1</sup>H-NMR for **9b**

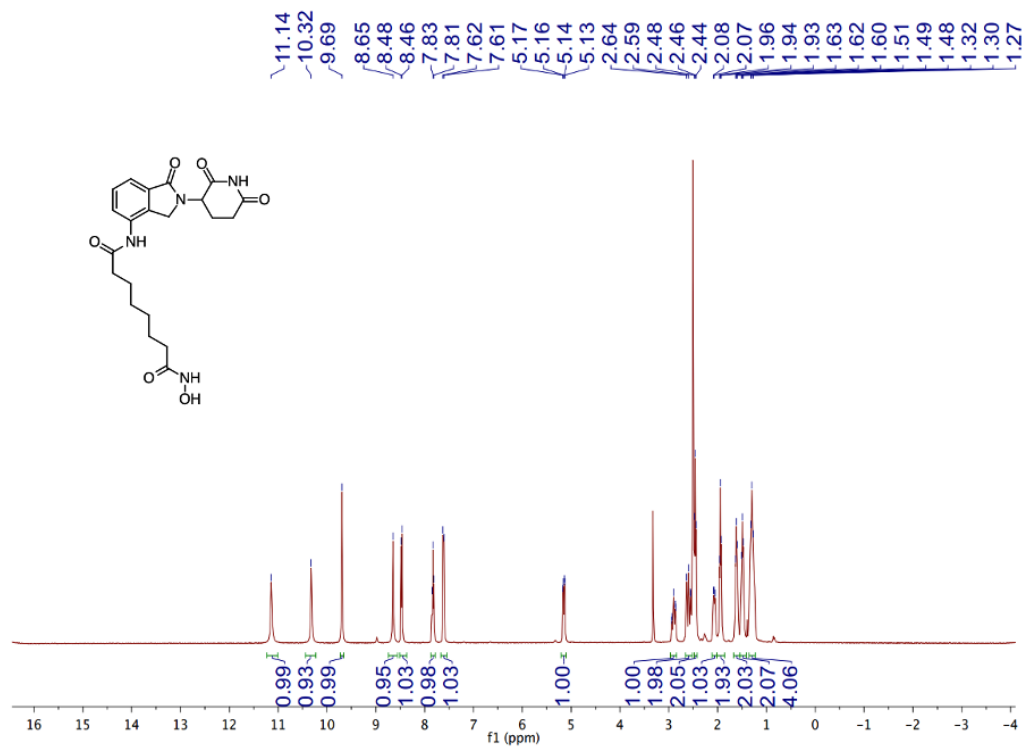

<sup>13</sup>C-NMR for **9b**

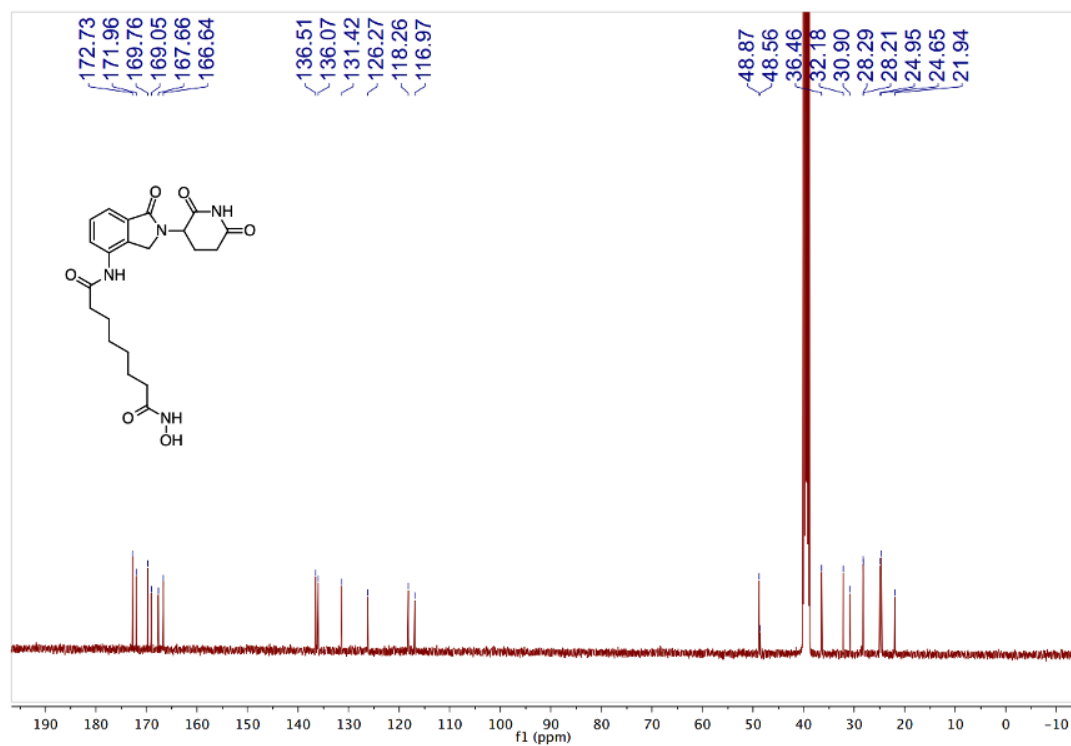

<sup>1</sup>H-NMR for **9c**

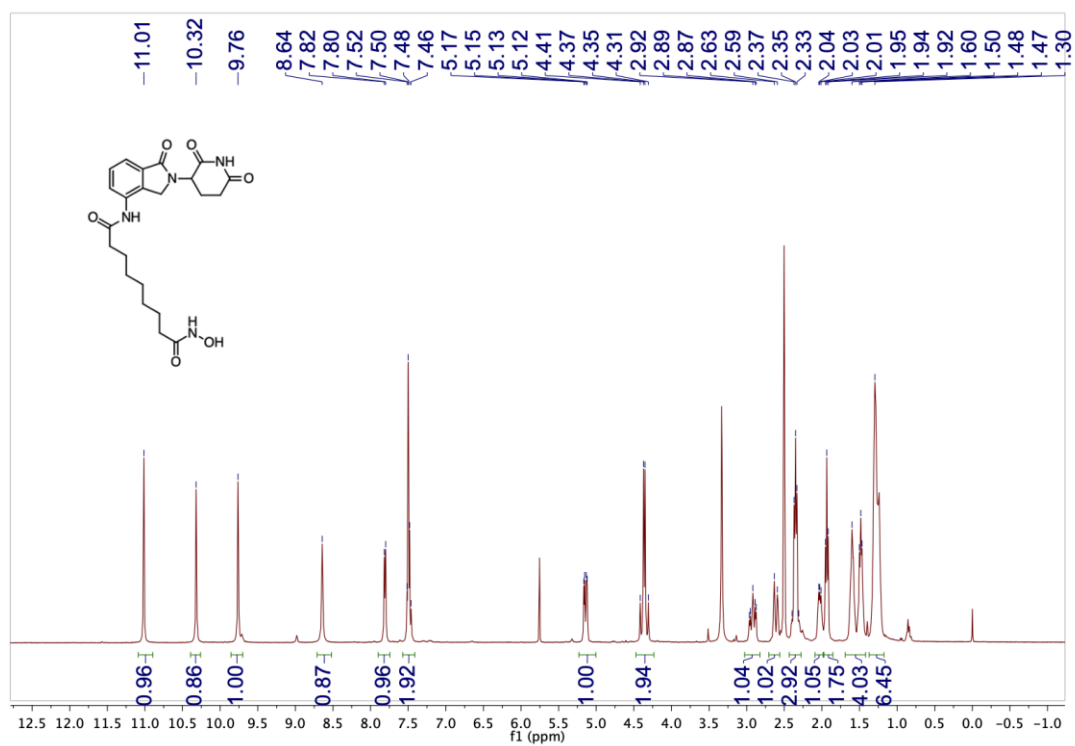

<sup>13</sup>C-NMR for **9c**

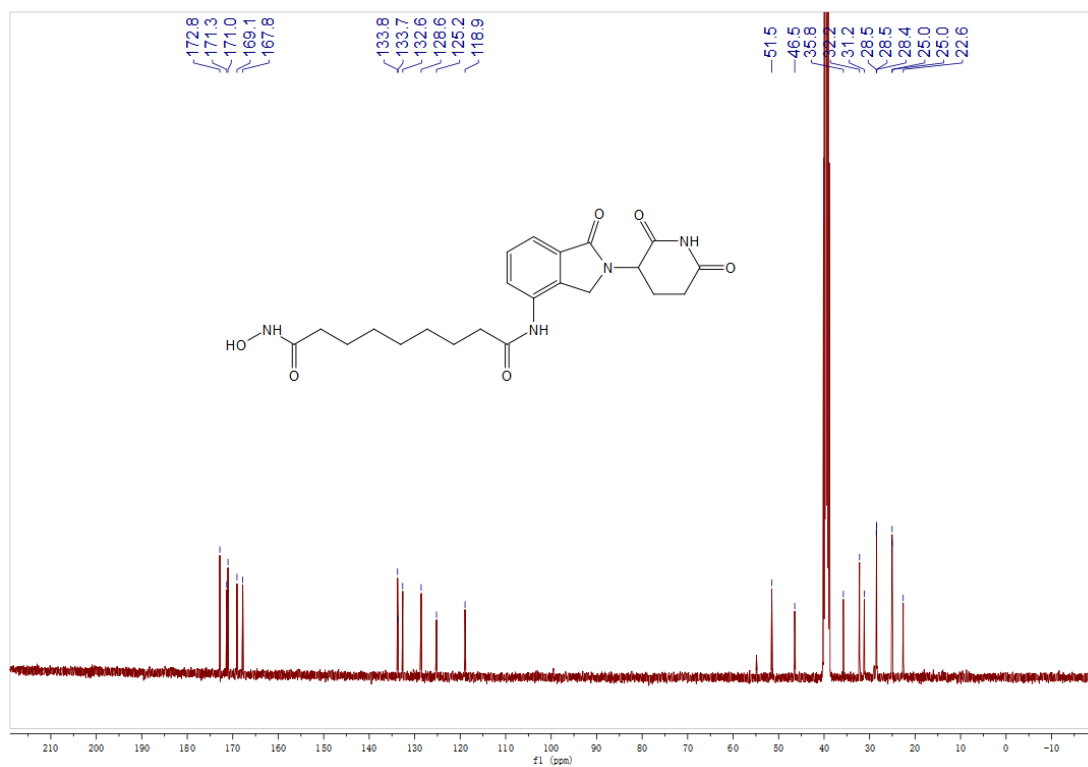

<sup>1</sup>H-NMR for **9d**



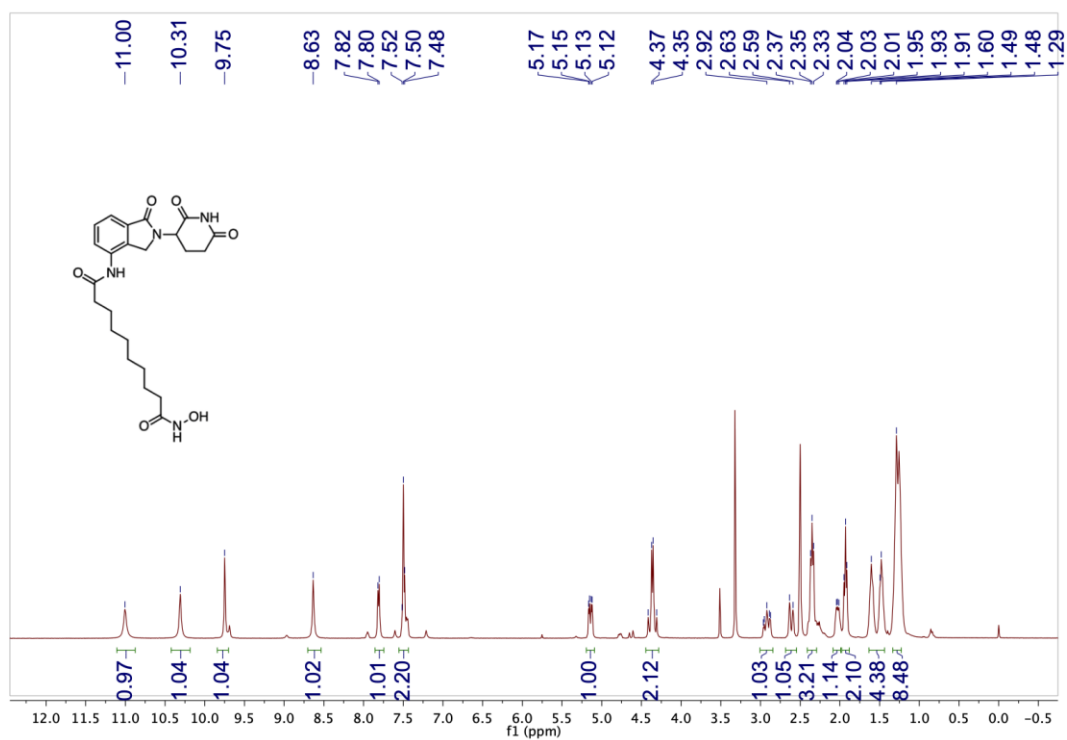

<sup>13</sup>C-NMR for 9d

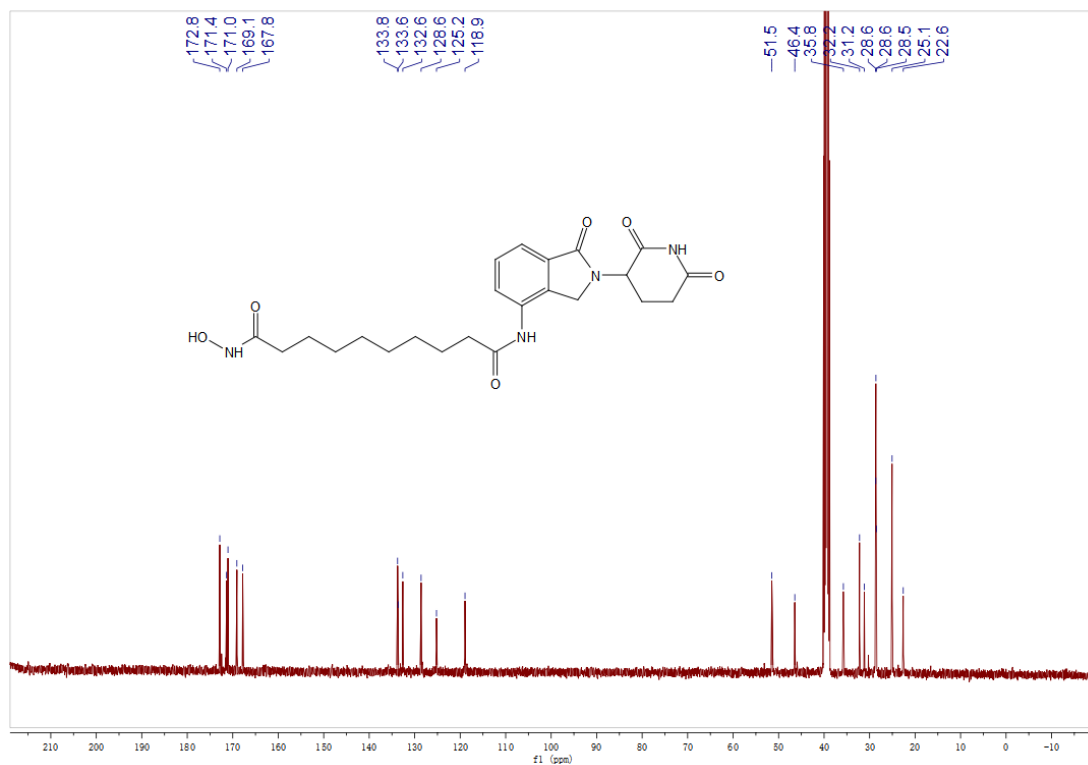

<sup>1</sup>H-NMR for 9e

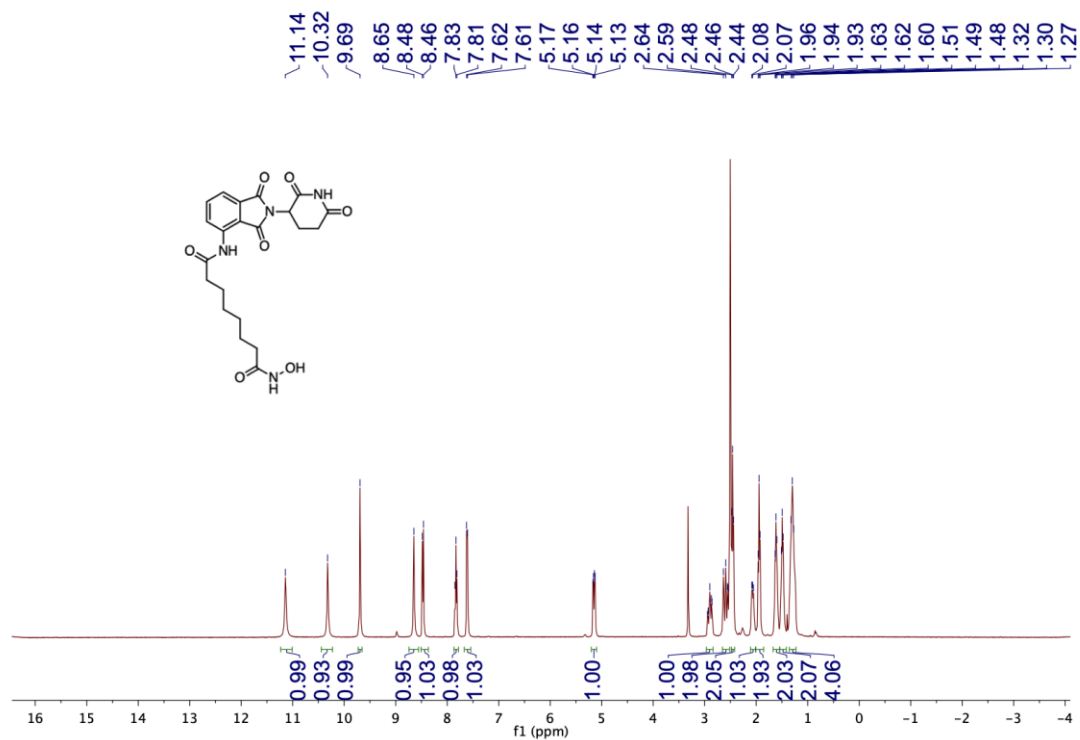

<sup>13</sup>C-NMR for 9e

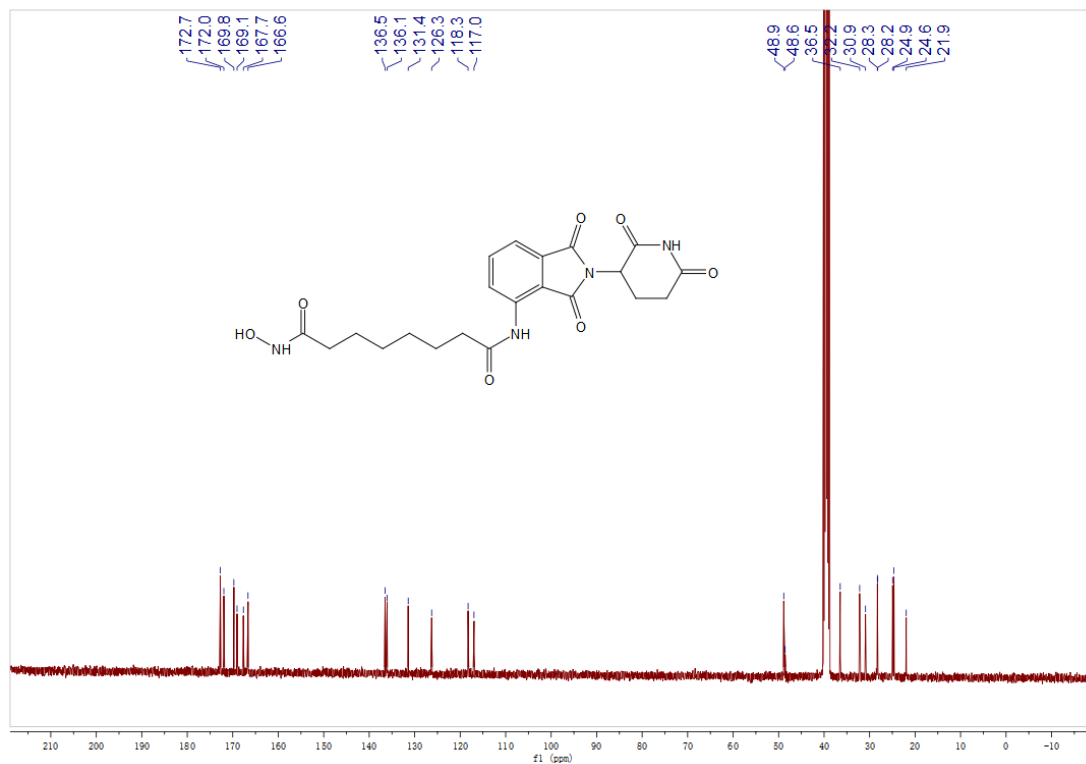

<sup>1</sup>H-NMR for 15a

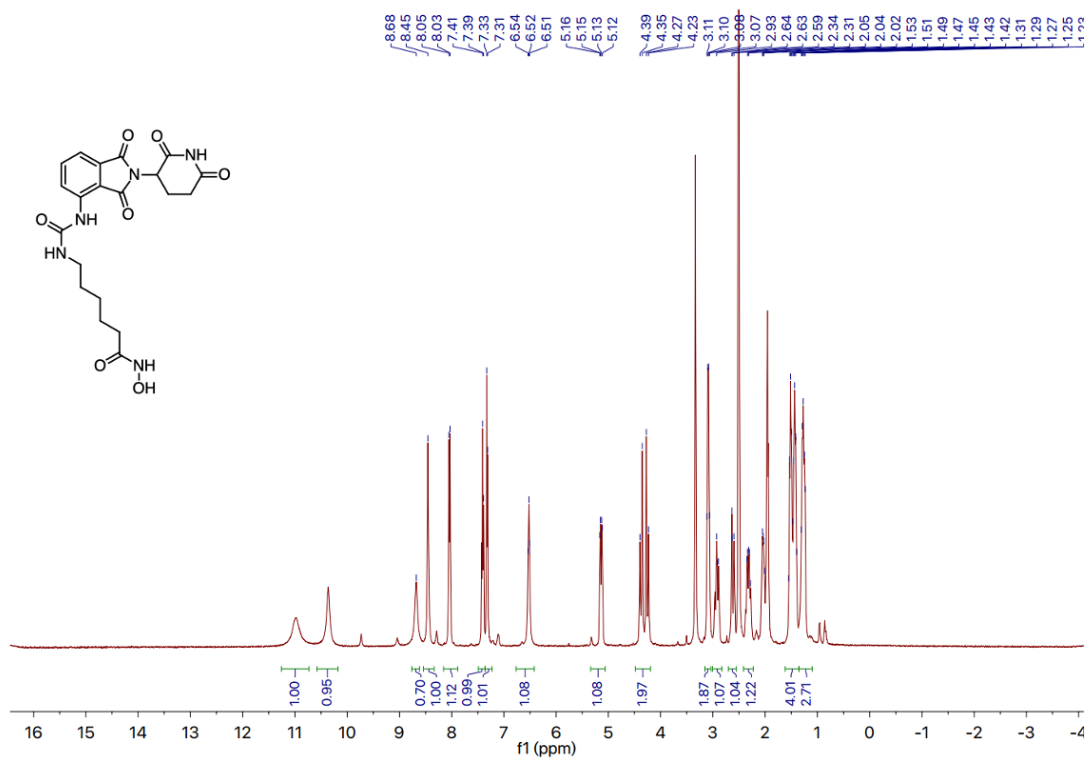

<sup>13</sup>C-NMR for **15a**

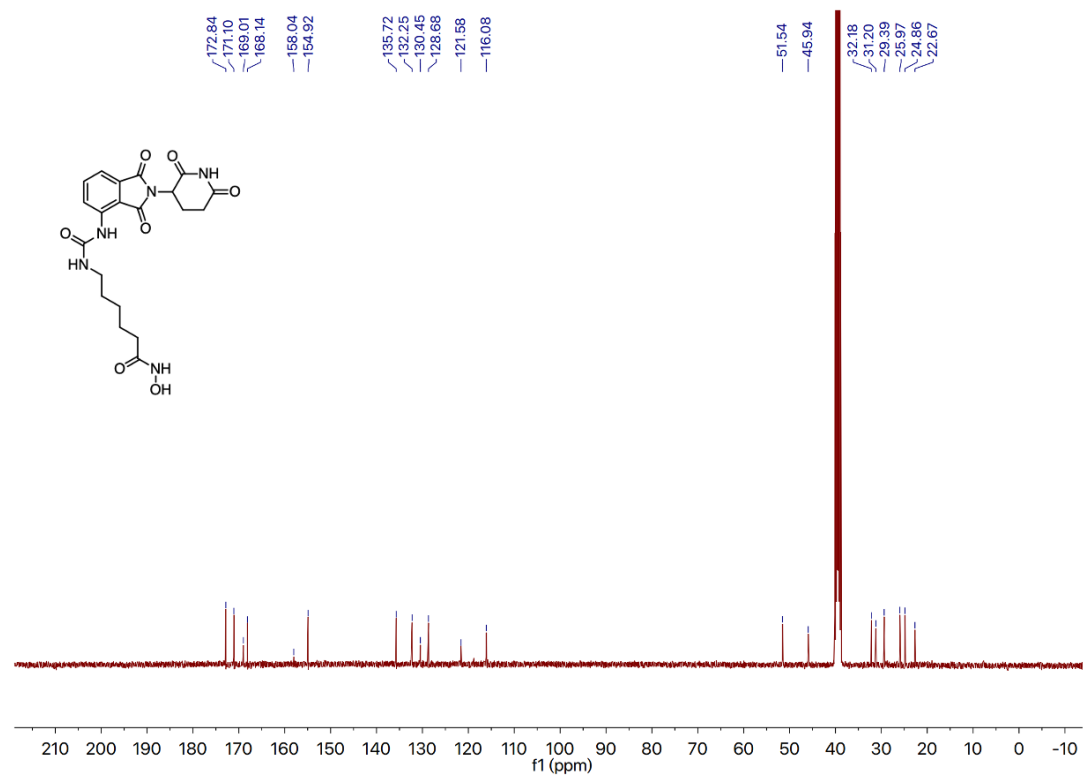

<sup>1</sup>H-NMR for **15b**

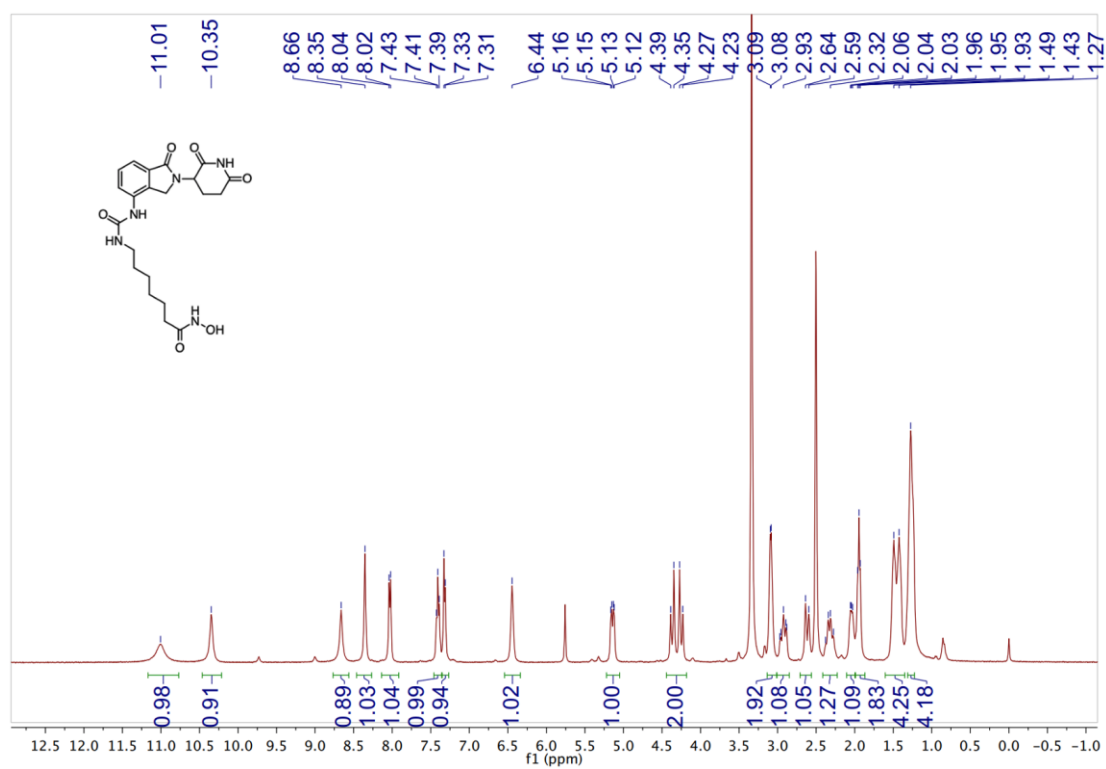

<sup>13</sup>C-NMR for **15b**

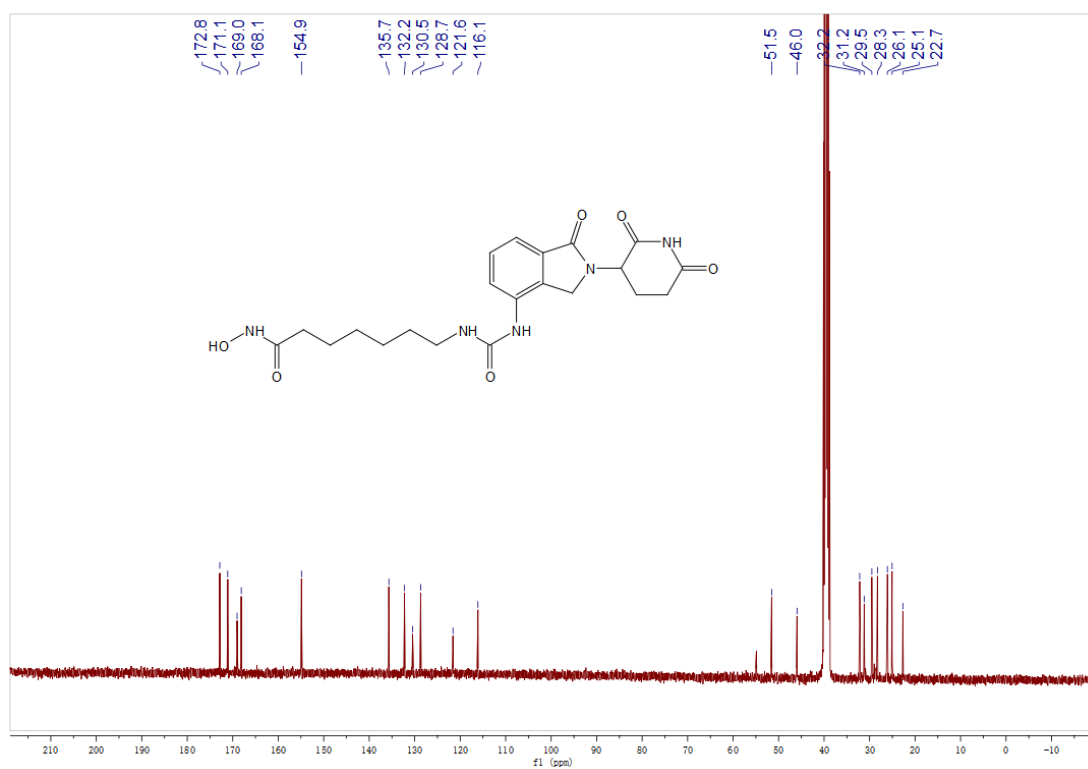

<sup>1</sup>H-NMR for **15c**

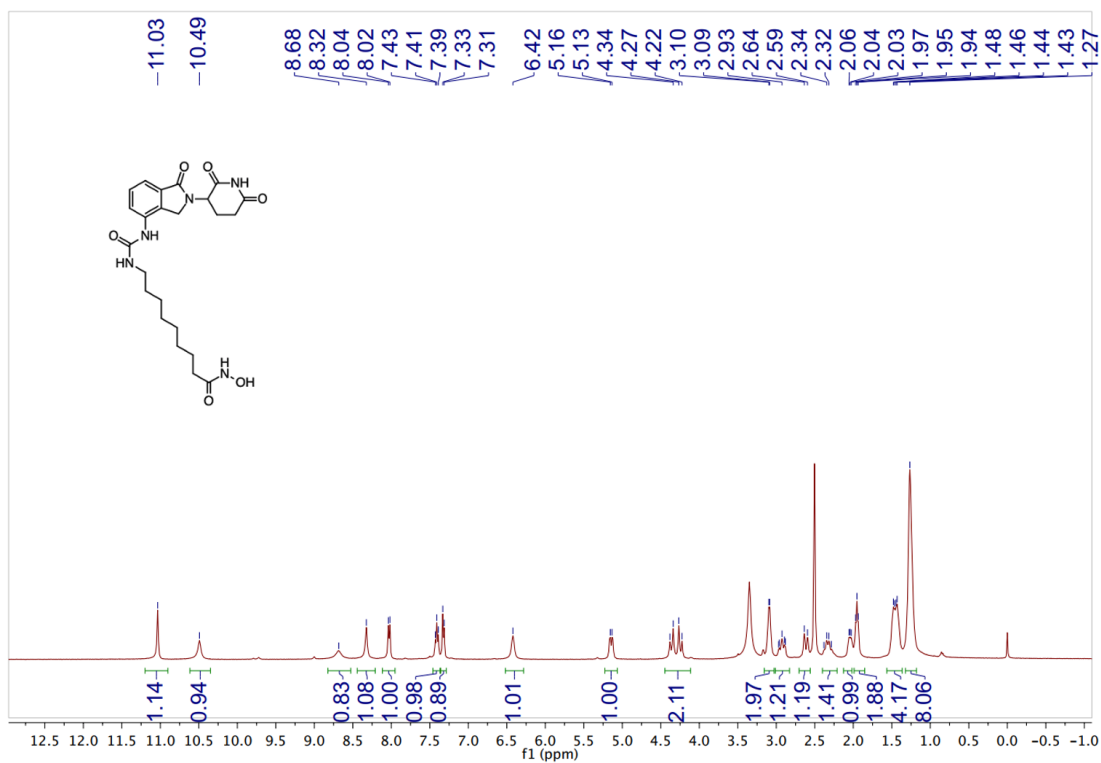

<sup>13</sup>C-NMR for 15c

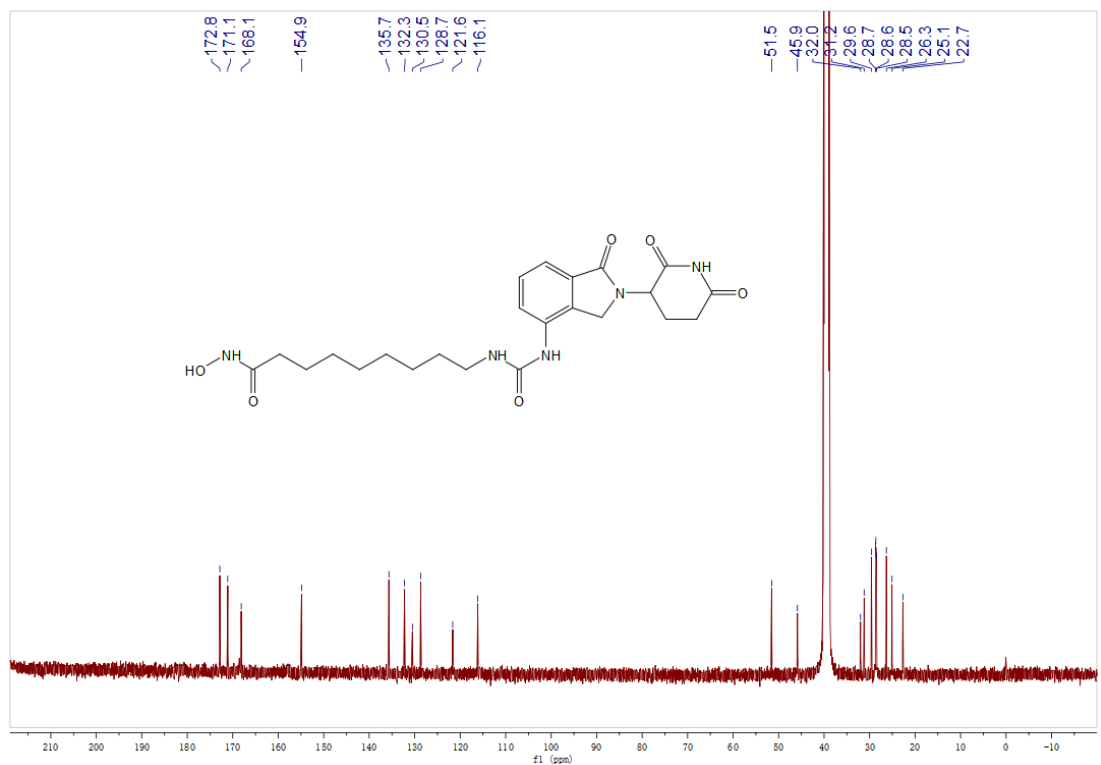

<sup>1</sup>H-NMR for 15d

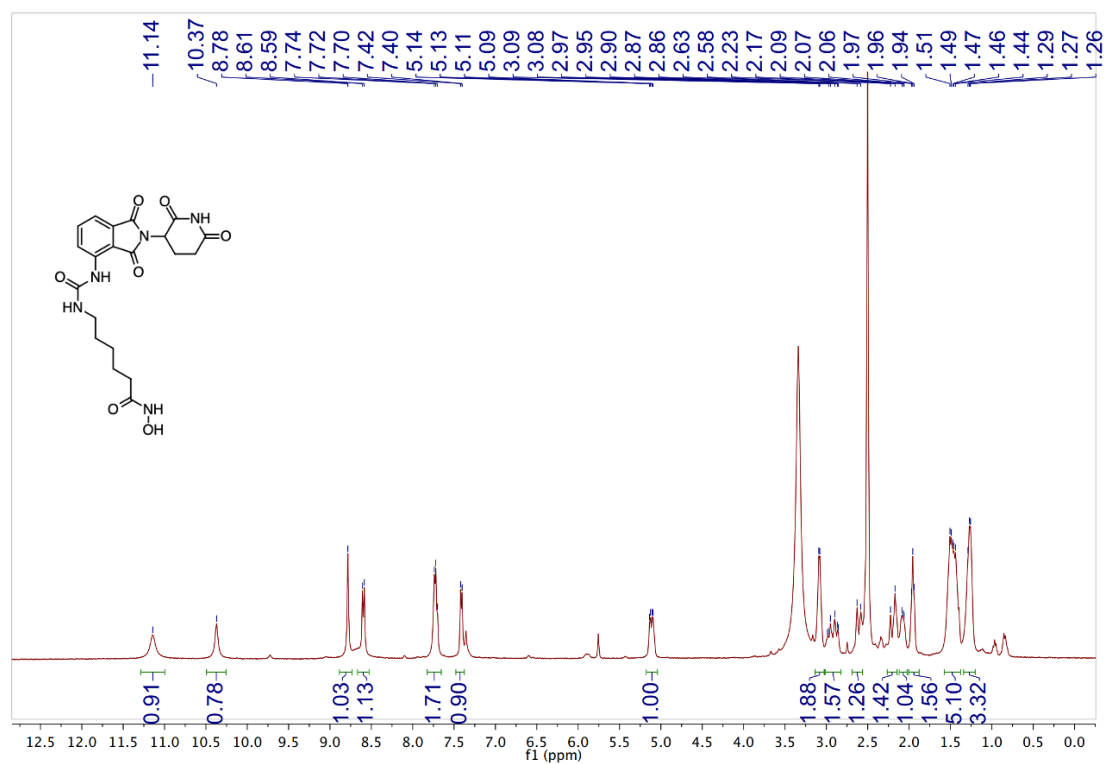

<sup>13</sup>C-NMR for 15d

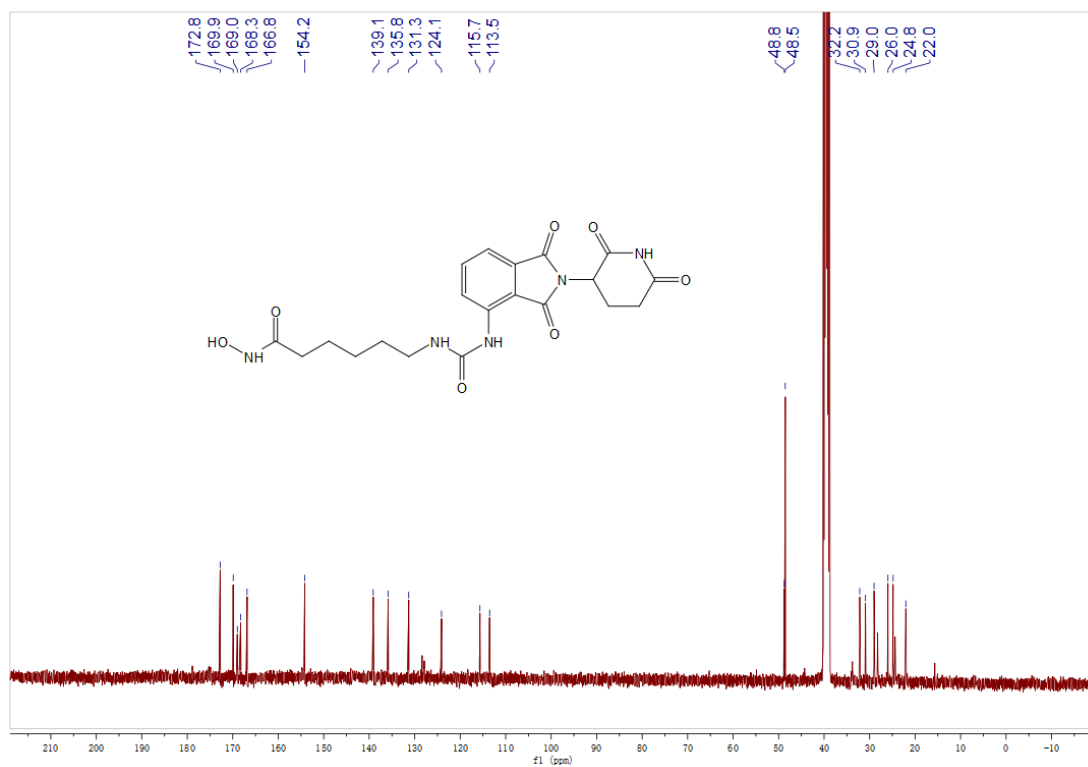

<sup>1</sup>H-NMR for 21a

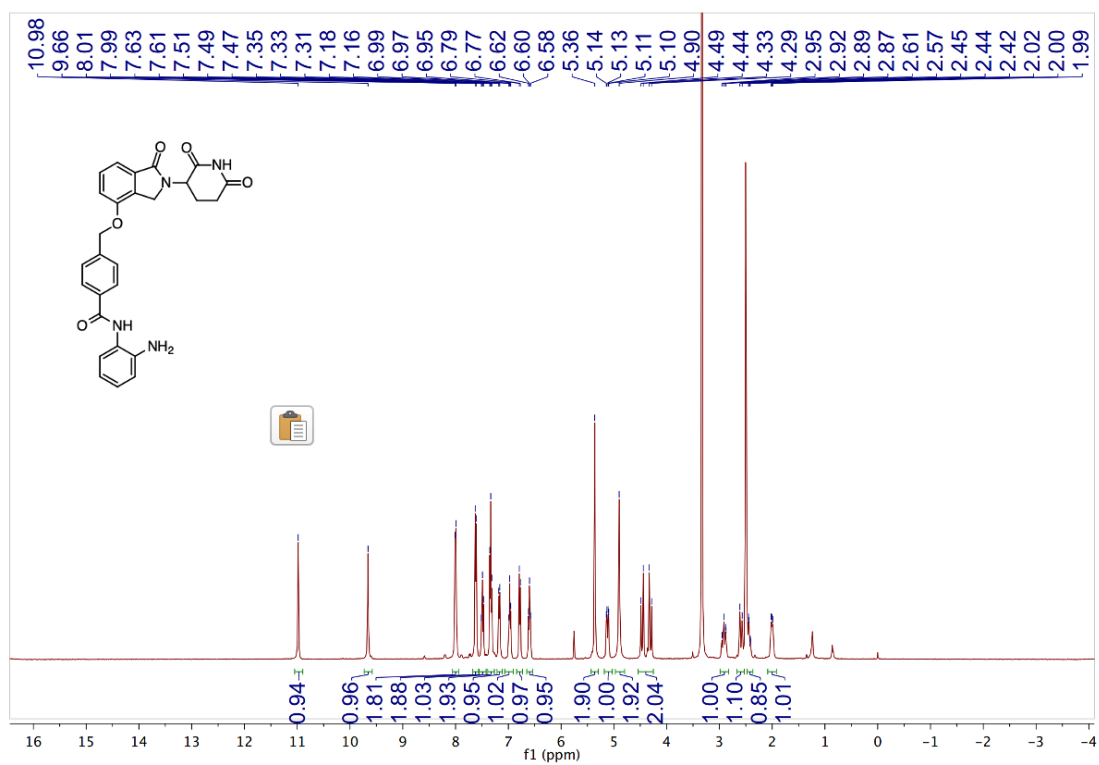

<sup>13</sup>C-NMR for 21a

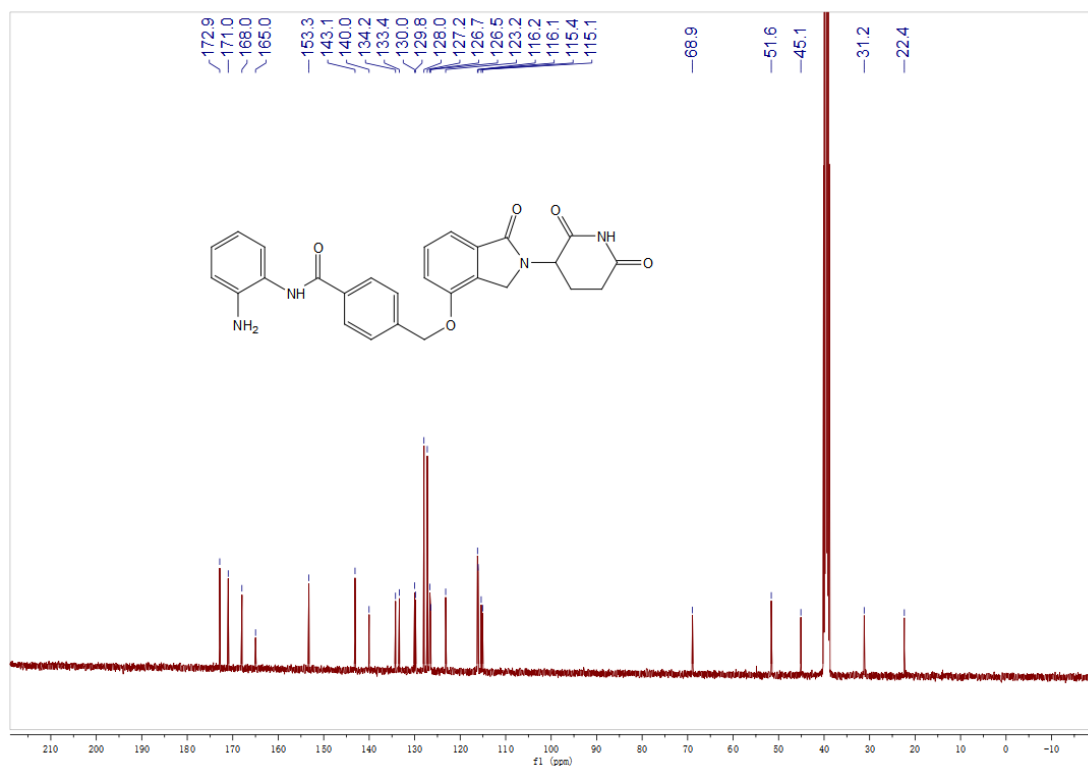

<sup>1</sup>H-NMR for 21b

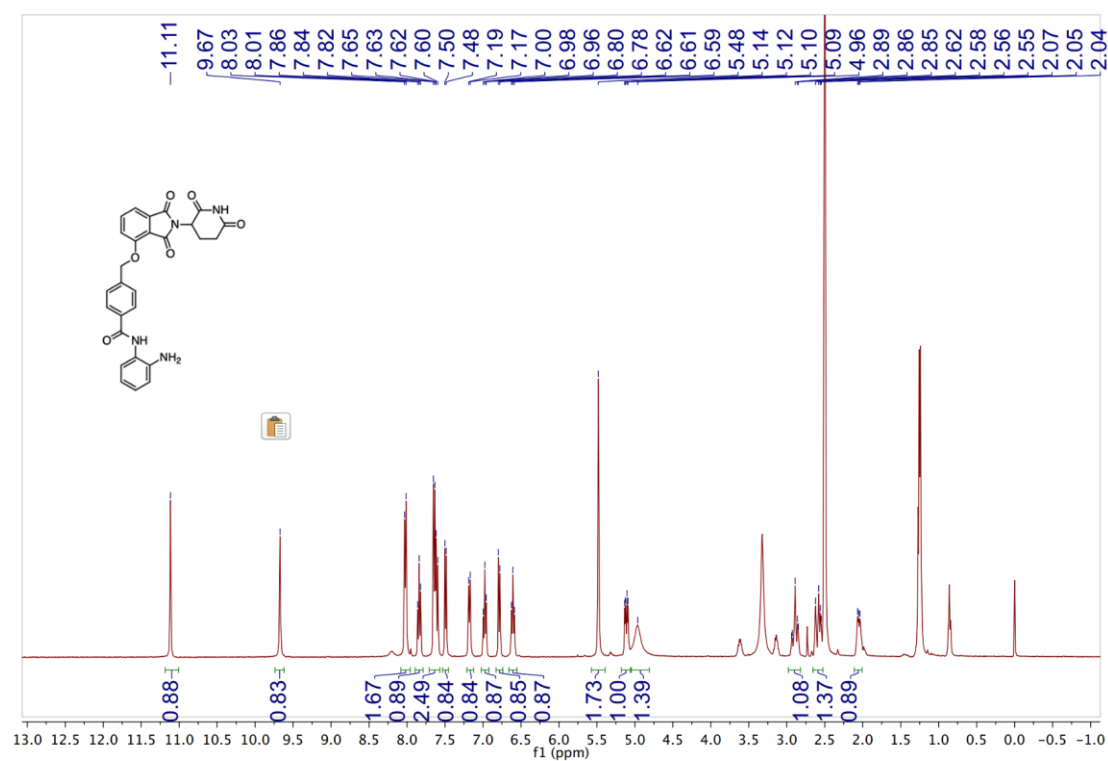

**<sup>13</sup>C-NMR for 21b**

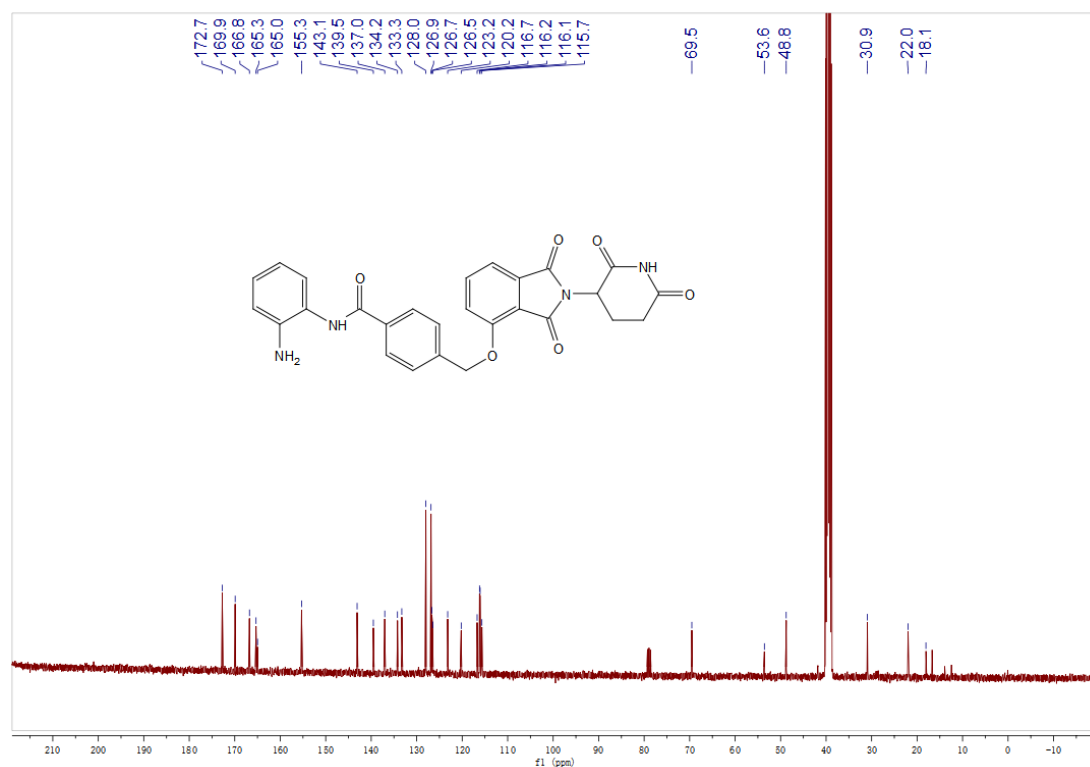

**<sup>1</sup>H-NMR for 23a**



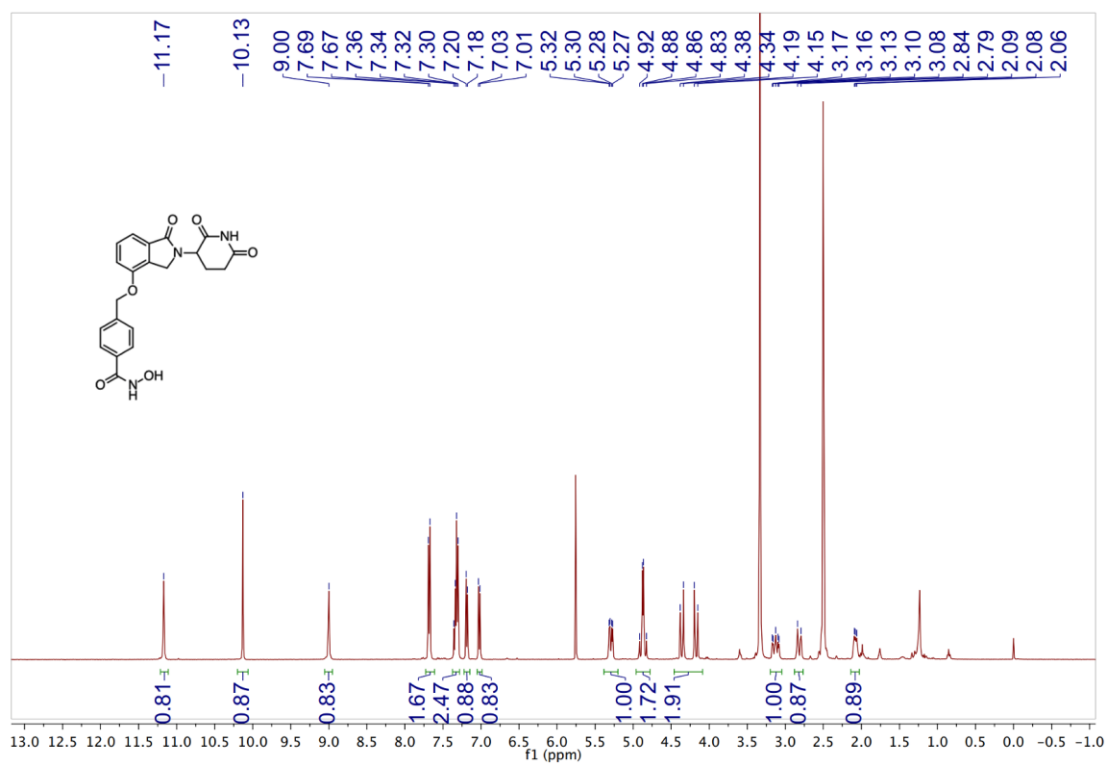

<sup>13</sup>C-NMR for **23a**

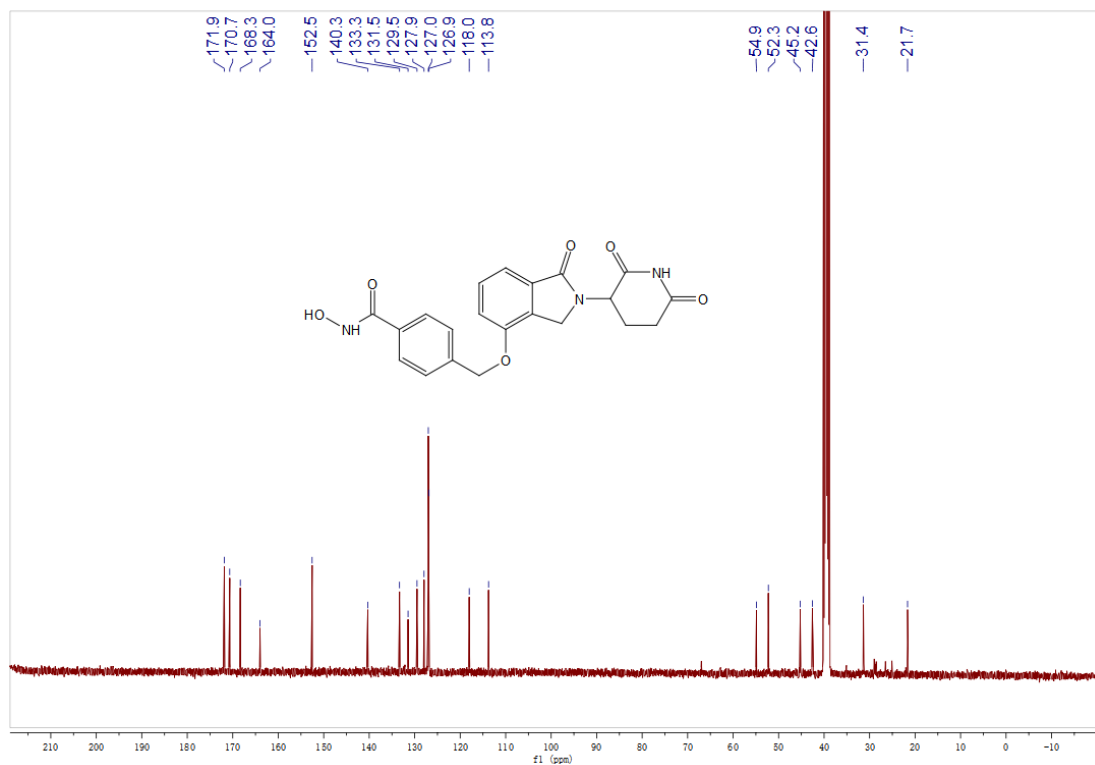

<sup>1</sup>H-NMR for **23b**

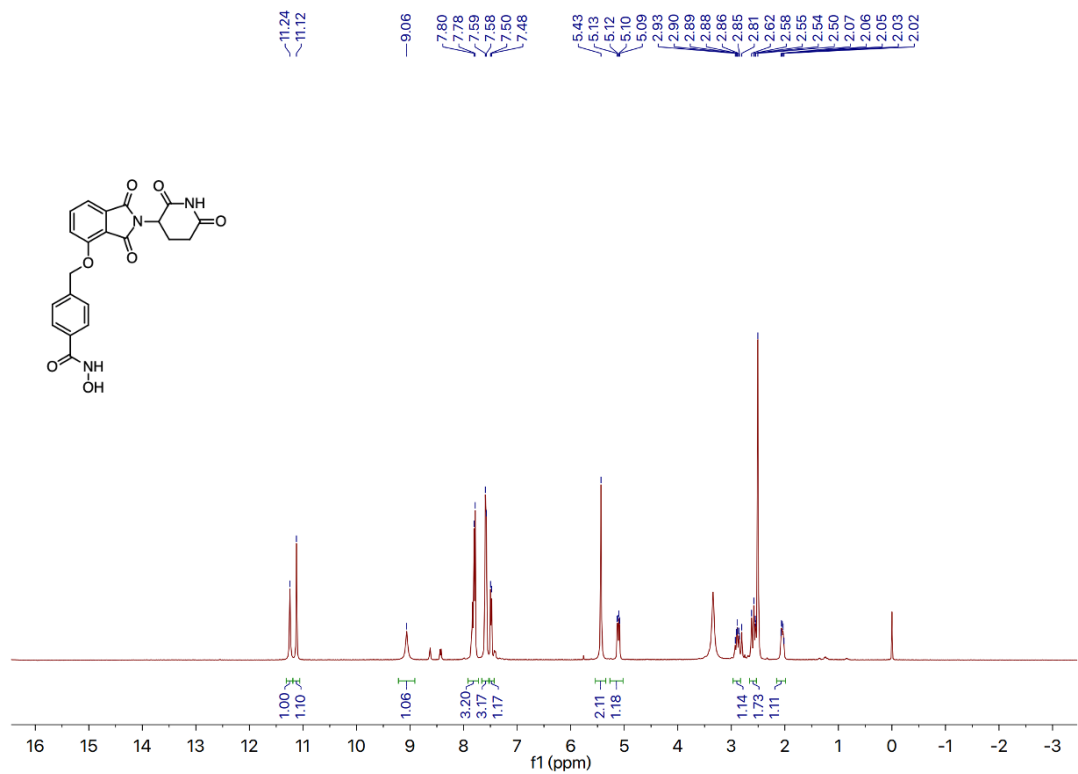

<sup>13</sup>C-NMR for **23b**

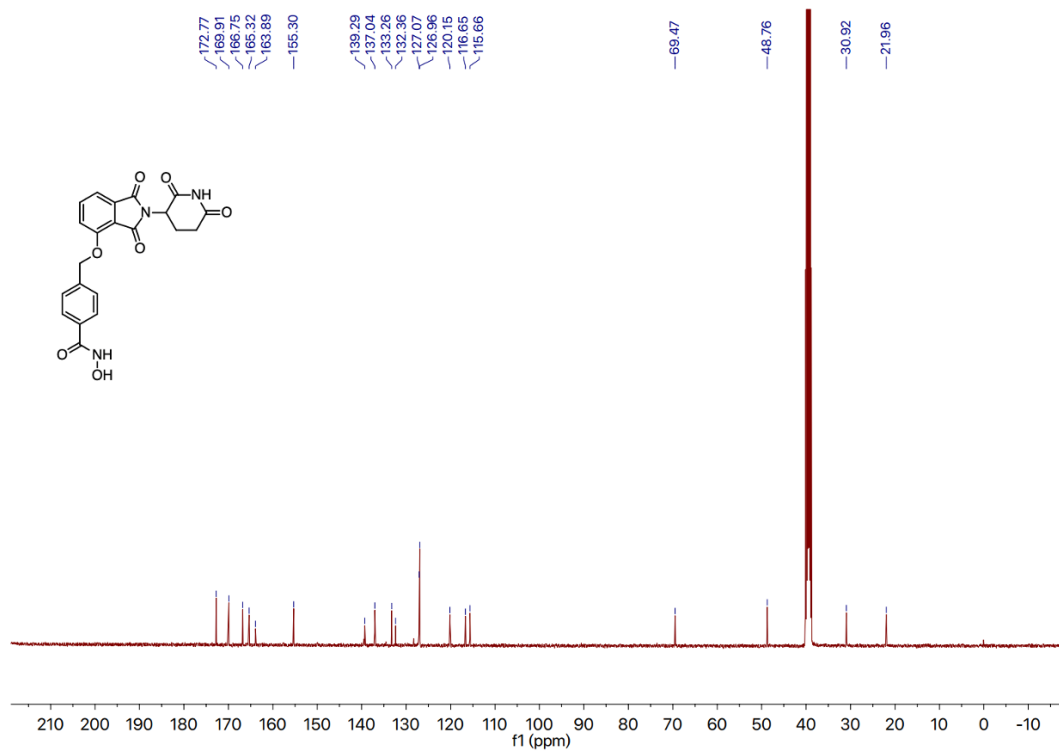

Supplement: s1 [file s1]
